# Supplementary material for: NAMPT and NAPRT serum levels predict response to anti-TNF therapy in inflammatory bowel disease
Source: PubMed Central journal article supplement (PMC9928959; doi:10.3389/fmed.2023.1116862), 2023-02-01
Supplement: Data_Sheet_1.pdf [file Data_Sheet_1.pdf]

## Supplementary Material

### NAMPT and NAPRT serum levels predict response to anti-TNF therapy in inflammatory bowel disease

Giorgia Colombo<sup>1§</sup>, Gian Paolo Caviglia<sup>2§</sup>, Alberto Ravera<sup>2</sup>, Elisa Tribocco<sup>2</sup>, Simone Frara<sup>2</sup>, Chiara Rosso<sup>2</sup>, Cristina Travelli<sup>3</sup>, Armando A. Genazzani<sup>1#\*</sup>, Davide Giuseppe Ribaldone<sup>2##\*</sup>

<sup>1</sup>Department of Pharmaceutical Sciences, Università del Piemonte Orientale, Novara, 28100, Italy.

<sup>2</sup>Division of Gastroenterology, Department of Medical Sciences, Università di Torino, 10100, Italy.

<sup>3</sup> Department of Drug Sciences, Università degli Studi di Pavia, Pavia, 27100, Italy.

§ These authors contributed equally to the work

# These authors contributed equally to the work

\* Correspondence:

Corresponding authors, armando.genazzani@uniupo.it, davidegiuseppe.ribaldone@unito.it

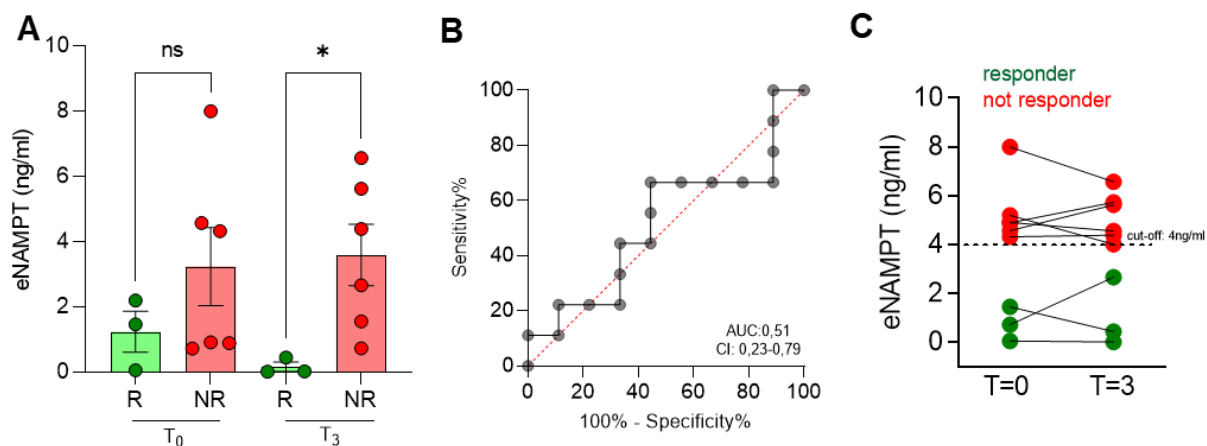

**Supplementary Figure 1.** (A) eNAMPT levels in R and NR to ustekinumab at baseline (T=0) and after 3 months from the first infusion (T=3). N=9: CD=5, UC=4. (B) ROC curve of ustekinumab

response. (C) eNAMPT levels in single patients after ustekinumab infusion. N=9: CD=5, UC=4. Red dots represent NR, green dots represent R.

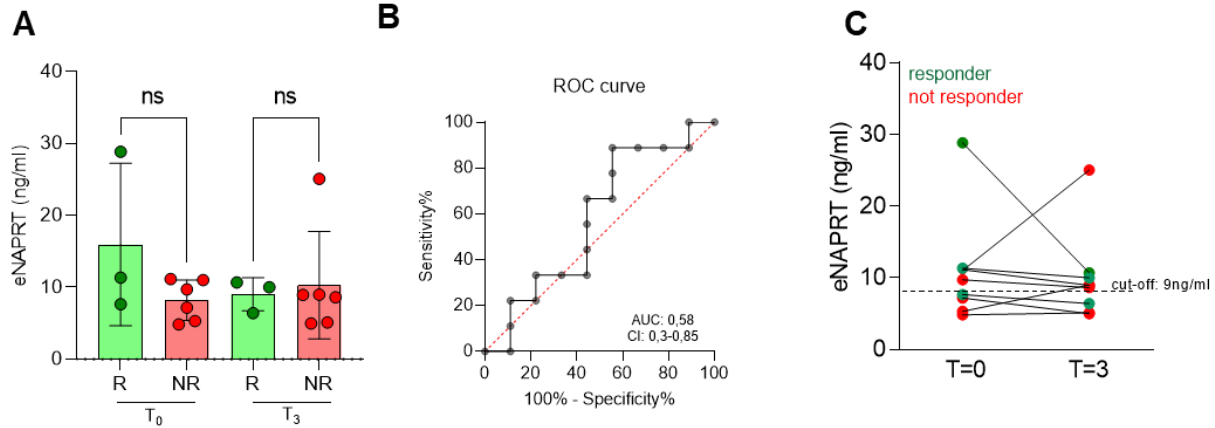

**Supplementary Figure 2.** (A) eNAMPT levels in R and NR to ustekinumab at baseline (T=0) and after 3 months from the first infusion (T=3). N=9: CD=5, UC=4. (B) ROC curve of ustekinumab response. (C) eNAMPT levels in single patients after ustekinumab infusion. N=9: CD=5, UC=4. Red dots represent NR, green dots represent R.

|                                       | Moschen, 2007 <sup>13</sup> | Valentini, 2007 <sup>19</sup> | Waluga, 2014 <sup>15</sup> | Dogan, 2016 <sup>14</sup> | Terzoudis, 2016 <sup>17</sup> | Neubauer, 2019 <sup>16</sup>                              | Colombo, 2020 <sup>12</sup> | Saadoun, 2021 <sup>18</sup> | Colombo, present contribution           |
|---------------------------------------|-----------------------------|-------------------------------|----------------------------|---------------------------|-------------------------------|-----------------------------------------------------------|-----------------------------|-----------------------------|-----------------------------------------|
| <b>Number of Patients</b>             | HC 38<br>CD 39<br>UC 35     | HC 37<br>CD 67<br>UC 61       | HC 16<br>CD 24<br>UC 16    | HC 29<br>CD 0<br>UC 31    | HC 98<br>CD 68<br>52 UC       | no-IBD 60 <sup>#</sup><br>CD 113<br>UC 127                | HC 11<br>CD 64<br>UC 22     | HC 30<br>CD 29<br>UC 56     | HC 18<br>CD 128<br>UC 52                |
| <b>Evaluation</b>                     |                             |                               |                            |                           |                               |                                                           |                             |                             |                                         |
| eNAMPT (HC vs IBD) <sup>a</sup>       | ↑                           | n.r.                          | ↑                          | n.r.                      | n.r.                          | ↑                                                         | ↑                           | ↑                           | ↑                                       |
| eNAMPT (active vs inactive/remission) | 0 in CD<br>↑ in UC          | 0 in CD<br>↑ in UC            | n.r.                       | n.r. in CD<br>↑ in UC     | n.r.                          | 0 in CD<br>↑ in UC                                        | n.r.                        | n.r.                        | ↑ in CD<br>↑ in UC                      |
| CRP                                   | n.r.                        | 0                             | n.r.                       | n.r.                      | 0                             | 0 (hsCRP)                                                 | n.r.                        | +                           | +                                       |
| Severity                              | n.r.                        | n.r.                          | 0 Montreal classification  | n.r.                      | n.r.                          | + Rachmilewitz index (UC)<br>+ Mayo endoscopic score (UC) | n.r.                        | + Montreal classification   | + Severity score (HBI and Mayo's score) |
| Calprotectin                          | n.r.                        | n.r.                          | n.r.                       | n.r.                      | n.r.                          | n.r.                                                      | n.r.                        | +                           | 0                                       |
| IL-6                                  | n.r.                        | n.r.                          | n.r.                       | n.r.                      | n.r.                          | +                                                         | n.r.                        | n.r.                        | +                                       |
| IL-10                                 | n.r.                        | n.r.                          | n.r.                       | n.r.                      | n.r.                          | n.r.                                                      | n.r.                        | n.r.                        | -                                       |
| IL-8                                  | n.r.                        | n.r.                          | n.r.                       | n.r.                      | n.r.                          | +                                                         | n.r.                        | n.r.                        | 0                                       |
| TNFα                                  | n.r.                        | n.r.                          | n.r.                       | n.r.                      | n.r.                          | +                                                         | n.r.                        | n.r.                        | 0                                       |
| Age                                   | n.r.                        | n.r.                          | n.r.                       | n.r.                      | n.r.                          | 0                                                         | n.r.                        | 0                           | 0                                       |
| Years of disease                      | n.r.                        | 0                             | 0                          | n.r.                      | 0                             | 0                                                         | n.r.                        | n.r.                        | 0                                       |

**Supplementary Table I. Evidence so far gathered on eNAMPT in IBD patients.** Information was extracted either from the text or from the Figures/Tables of the indicated manuscripts. HC healthy controls; CD Crohn's disease; UC ulcerative colitis; n.r. not reported; + positive correlation; 0 no correlation or no change; - negative correlation; ↑ increase; <sup>a</sup>overall population studied, independently of variables (*e.g.*, active, remission, severity).<sup>#</sup>no-IBD included both healthy patients and patients suffering from irritable bowel disease.
